# Supplementary material for: Integration of Signals along Orthogonal Axes of the Vertebrate Neural Tube Controls Progenitor Competence and Increases Cell Diversity
Source: PLoS Biol. 2014 Jul 15;12(7):e1001907. doi: 10.1371/journal.pbio.1001907 (PMC4098999; doi:10.1371/journal.pbio.1001907)
Supplement: Table S1 — Sequences of qRT-PCR primers. (XLS) [file pbio.1001907.s009.xls]

## Sheet: Sheet1
species	ensembl/NCBI name	gene name	forward	reverse
chicken	ENSGALG00000009621	Actin	GAGAAATTGTGCGTGACATCA	CCTGAACCTCTCATTGCCA
chicken	ENSGALG00000011489	Brachyury	CCCAATCCCTACACCCATAG	CAATTGTCATGGGACTGGAG
chicken	ENSGALG00000005768	ETV5	CCACGATGGATTCTCGTATG	GCTTCACCTTACCCTCCAGT
chicken	ENSGALG00000007706	FGF8	ACGGGGTTCTACATCTGCAT	TTGTTCTCCAGCACGATCTC
chicken	AB050939	FoxA2	AGCAGTCGCCCAACAAGATG	TCTGGCGGTAGAAGGGGAAG
chicken	XM_001233326	FoxJ1	AGACCAAAATCACCCTGTCC	AGGTTGTGTCGGATGGAGTT
chicken	ENSGALG00000014639	Gli1	GAAATCGGAGGGTGACATTT	AGGTTTCCCATCCTCCTTCT
chicken	NM_001005848	HES1	GGACATCCTGGAGATGACG	GTCACCTCGTTCATGCACTC
chicken	ENSGALG00000005499	IL17RD/SEF	ACTTCTGTGGCTGTGAGGTG	ATTTCATTCCCTTGGAGCAC
chicken	ENSGALG00000013194	Irx1	GTGAGGTCGTTTTTGGGAGT	GTGTTTGGGACTGGTCCTCT
chicken	AF157620	Irx3	CCTACGGGCAGTACCAGTTC	GCATGATCTTCTCACCCTTG
chicken	ENSGALG00000003588	Irx5	GTACAGCACCAGCGTGATTT	ACTGGAGGTGCGAGTTGTAA
chicken	ENSGALG00000001124	Lhx2	GCATGAAGGACAATCTGGTG	CATCCGAGTGATTGAAATGC
chicken	ENSGALG00000011207	MKP3	GGCGTTCTATCTAGAAGGTGGT	TACACGAGCTGTCTAGGTTCGT
chicken	ENSGALG00000010862	Nato3	AGGATGTTCAACCTCAACGAG	GGTCATGAAGGAGATGTACACG
chicken	ENSGALG00000023406	Nkx1.2	GGTGGCTTTGGAGAACAAAT	TGGAACCAGATCTTCACCTG
chicken	AF110994	Nkx2.2	CCCAGGTGAAGATCTGGTTC	GGAGGGGAGAGGATTCACTT
chicken	ENSGALG00000013862	Olig3	GGCGGCAAGTACAAGATCA	GGTTGAGGTCGTGCATCC
chicken	ENSGALG00000012123	Pax6	ATTACTCTCGGAGGGGGTCT	TCAGCATCCTTAGCTTGTCG
chicken	ENSGALG00000006379	Shh	CCCCAAATTACAACCCTGAC	CATTCAGCTTGTCCTTGCAG
chicken	ENSGALG00000015241	Snail2	CTCCAGACCCTGGCTACTTC	GATGAGCCCTCAGATTGGAT
chicken	ENSGALG00000012290	Sox10	GAGGAAATTGGCTGACCAGTA	AGGGACGCTTATCACTTTCATT
chicken	ENSGALG00000001093	TCF3	ATGAGCCAGTCCAGCTACG	CCACCATTCAACTCTCCTGA
chicken	XM_003643575	Wnt1	CGTCTGATCCGACAGAACC	CGATCTTGCCAAAGATGTTG
chicken	DQ022307	Wnt3A	CAACAATGAAGCTGGAAGGA	TGAAGTCAGGCTGAGACCAC
chicken	AB193181	Wnt8C	TTCCAAGCTCTTTGTGGATG	TGGCTTTCACAGCAAGTCTC
mouse	ENSMUSG00000035277	Arx	TTCCAGAAGACGCACTACCC	TCTGTCAGGTCCAGCCTCAT
mouse	ENSMUSG00000025219	FGF8	GCTCATTGTGGAGACCGATA	AATACGCAGTCCTTGCCTTT
mouse	ENSMUSG00000037025	FoxA2	AGCAGAGCCCCAACAAGATG	TCTGCCGGTAGAAAGGGAAGA
mouse	ENSMUSG00000046518	Nato3	GCCTATCCAGAGAGCTGCTT	CCCTCTCTGTACCCCAGTGT
mouse	ENSMUSG00000048528	Nkx1.2	ACTGCCTTCACTTACGAGCA	AAATTTTGACCTGCGTCTCC
mouse	ENSMUSG00000027434	Nkx2.2	ATCCCCTTTTCCGCCTACAG	CTGGGCGTTGTACTGCATGT
mouse	ENSMUSG00000027168	Pax6	ACTTCAGTACCAGGGCAACC	ACTGATGGAGTTGGTGTTCTCTC
mouse	ENSMUSG00000007815	RhoA	GAATGACGAGCACACGAGAC	CCATATCTCTGCCTTCTTCAGG
